# 1 Metabolic trade-offs expose unforeseen benefits of plasmid car- 2 riage

3 Rafael C. Reding<sup>1</sup>

4 <sup>1</sup> Living Systems Institute, University of Exeter, Exeter EX4 4QD, UK.

5 Corresponding author: R.C.Reding-Roman@exeter.ac.uk.

6 Microbes without plasmids divide faster than those harbouring them. Microbiolo-  
7 gists rely on this difference in growth rate between both types of microbe to foresee  
8 whether a plasmid will be maintained, or else purged by the host to avoid extinc-  
9 tion. However, here I report that plasmids change multiple life-history traits and  
10 show that growth rate *alone* can be a bad predictor for plasmid maintenance. Pair-  
11 wise competition experiments between two constructs of *Escherichia coli*—one of  
12 which carries a plasmid—revealed that harbouring plasmids can also increase yield  
13 and delay growth (lag). Crucially, yield engaged in a trade-off with growth rate.  
14 The plasmid borne by one construct (**R**), non-transmissible and with a tetracycline-  
15 resistance gene, reduced its host's growth rate by 20%. However, given this trade-  
16 off, **R** outgrew its sensitive counterpart (**S**) in the absence of tetracycline when the  
17 competition favoured yield over growth rate. The trade-off makes unclear whether  
18 the plasmid is costly to maintain. **R**-mutants that acquired additional copies of the  
19 plasmid, through random segregation, exploited this trade-off and were selected  
20 with tetracycline concentrations below the 'minimal selective concentration'—the  
21 lowest antimicrobial concentration thought to select for resistant mutants. My  
22 data suggests that plasmids interfere with multiple traits, and whether plasmids  
23 are costly to maintain will depend on the relationship between them and which is  
24 under strongest selection. Thus, concepts that rely on plasmid carriage costs must  
25 be used cautiously.

## 26 Introduction

27 Plasmids are independent genetic elements that complement the chromosome of prokaryotes<sup>1,2</sup>  
28 and eukaryotes<sup>3</sup> alike. They can benefit cells harbouring them—notoriously in the form of  
29 resistance to antibiotics—but the metabolic costs associated with their upkeep can reduce the  
30 host's growth rate<sup>2,4</sup>. Clinicians and evolutionary biologists exploit the sensitivity of growth rate  
31 to plasmid carriage, using pairwise competition experiments to estimate the costs of plasmid  
32 maintenance<sup>5–8</sup> and whether a plasmid will be maintained through time. Their conclusion is  
33 straightforward: microbes without plasmids multiply faster in environments where plasmids are  
34 not beneficial, and overthrow microbes harbouring them<sup>4,7</sup>.

35 Bacteria, however, can maintain plasmids that have no evident benefit—despite reducing  
36 their growth rate<sup>2,9–11</sup>. So, where is the hidden benefit? Plasmids are known to reduce the  
37 host's growth rate, but the metabolic alterations that plasmids introduce are unclear<sup>12–15</sup>. Here

38 I asked whether growth rate is the only life-history trait that is sensitive to plasmid carriage,  
39 and it is not. I analysed the growth dynamics of two identical constructs<sup>16</sup> of *Escherichia coli*,  
40 one of which (R in the remainder) harbours a non-transmissible plasmid with a tetracycline  
41 resistance gene, and found that plasmids can also delay the onset of growth (lag) and increment  
42 biomass yield. Growth rate and yield engaged in a trade-off that is highly sought after<sup>17–19</sup>.

43 R-cells exploited this trade-off in pairwise competition experiments without tetracycline.  
44 The competition favoured yield over growth rate, resulting in R preserving the plasmid—with  
45 a tetracycline-resistance gene—for 80< generations. The trade-off between rate and yield has  
46 unforeseen consequences beyond plasmid maintenance. The estimation of antimicrobial concen-  
47 trations that select for drug-resistant mutants—‘mutant selection windows’<sup>6</sup>—relies on similar  
48 costs, so, how does the above trade-off affect the estimation of selection windows? As I demon-  
49 strate below, drug-resistant mutants that exploit this trade-off can be selected below the mutant  
50 selection window.

51 I exposed a mixture of both constructs, S and R, to a range of tetracycline concentrations  
52 during a 7-day pairwise competition experiment that favoured yield over growth rate. With-  
53 out tetracycline R-cells maintained the plasmid with little variation in the number of copies  
54 borne, but with antibiotic this number changed: R-cells exposed to more drug hosted more  
55 plasmids, even at concentrations below the minimal selective concentration—which defines the  
56 lower boundary of the selection window<sup>6</sup>. The gain was detectable within 24h. Mutants har-  
57 bouring more plasmids had lower yields and shorter lags, but their growth rate increased during  
58 the same period. Thus, when plasmids trigger metabolic trade-offs, they can be either costly or  
59 beneficial depending on which trait is under selective pressure. Random segregation, commonly  
60 associated with plasmid loss in the absence of selection<sup>7</sup>, can also explain the accumulation of  
61 plasmids in these R-mutants.

## 62 Results

63 **Plasmid-mediated trade-off between rate, yield and lag.** Growth curves can provide  
64 insight into metabolic changes in bacteria. The transition from efficient to inefficient pathways,  
65 for example, can be detected analysing them<sup>20,21</sup>. I therefore sought changes in the growth  
66 curves (see methods) of two strains of *Escherichia coli* MC4100, one of which, R, bears the  
67 plasmid pGW155B<sup>16</sup>. This plasmid contains a tetracycline resistance gene, *tet(36)*, and is non-  
68 transmissible, that is, it cannot be transferred horizontally to other cells. Now, the growth  
69 curves showed that harbouring pGW155B penalised the growth rate of R by  $21.05\% \pm 2.01\%$   
70 (mean  $\pm$  standard error with  $n = 8$ , Mann-Whitney U-test  $p = 1.554 \times 10^{-4}$ , ranksum = 100)  
71 compared to its sensitive counterpart, S, as we may expect (Figure 1A). But they also exposed  
72 noteworthy differences in other growth parameters.

73 Despite their lower growth rate, cells harbouring pGW155B attained larger population sizes  
74 than cells without it. I used this parameter to estimate the biomass yield ( $y$ ) of both strains,  
75 a proxy for metabolic efficiency<sup>21</sup> defined as  $y = K/glc$ , where  $K$  is the population size in the  
76 equilibrium or *carrying capacity* and *glc* the supply of glucose. This metric suggests that R

77 cells, despite their slower growth rate, were the most efficient of both types (Mann-Whitney  
78 U-test for differences in carrying capacity  $p \approx 0.021$ , Figures 1B and C). Another parameter  
79 that I found sensitive to pGW155B was the lag phase—the period where cells negotiate their  
80 transition into growth—and its duration was considerably longer for the construct R (Figure  
81 1B, Mann-Whitney U-test  $p < 0.001$ ). In other words, growth rate, yield and lag engaged in a  
82 trade-off that was previously unknown and that, in my experimental setting, is triggered by the  
83 acquisition of pGW155B.

84 I asked whether R can take advantage of this trade-off without using tetracycline, which  
85 enforces the maintenance of pGW155B, and avoid extinction<sup>7</sup>. I propagated a culture containing  
86 equal proportions of each construct in media without tetracycline (see methods), and transferred  
87 the mixture into a new microtitre plate with fresh media only when R-cells reached stationary  
88 phase (after  $\sim 24$ h, see Figure 1A). I repeated this process for seven consecutive 24h seasons  
89 and, during this time, tracked the relative abundance of each type. As Figure 1E illustrates,  
90 R-cells remained a significant part of the mixture despite growing at slower rates. The trade-off  
91 can therefore be exploited by plasmid-harboured microbes.

92 **Rate-yield (RY) trade-off changes the interpretation of carriage costs.** Now, lag,  
93 yield and growth rate are sensitive to plasmid carriage and engaged in a trade-off. But the one  
94 between growth rate and yield is particularly relevant for clinicians and evolutionary biologists,  
95 who measure drug sensitivity using different traits.

96 The former frequently measure changes in bacterial density across a range of antibiotic  
97 concentrations<sup>22–25</sup>, whereas the latter measure changes in growth rate<sup>6,8,26</sup>. I therefore asked  
98 whether the above trade-off can influence the interpretation of antibiotic sensitivity tests, and  
99 exposed the strains S and R to a range of tetracycline concentrations to measure the minimum  
100 inhibitory concentration (MIC)—a metric of drug sensitivity commonly used in drug therapy  
101 design<sup>27,28</sup>. The plasmid borne by R increased its resistance to tetracycline by  $\sim 3,000\%$   
102 irrespectively of the trait I measured (Mann-Whitney U-test  $p = 0.083$ , ranksum = 55), but the  
103 MIC reported was, indeed, different for each trait (Figures 2A and S1A). Using growth rate data,  
104 the minimum inhibitory concentration for R was  $8.343 \pm 0.288 \mu\text{g/mL}$  of tetracycline (mean  $\pm$   
105 95% confidence, Figure 2A), whereas using bacterial density data the MIC was  $6.106 \pm 0.272$   
106  $\mu\text{g/mL}$  (Figure S1A). That is a  $\sim 35\%$  difference in the estimation of the same parameter. I  
107 found a similar gap for the tetracycline-sensitive strain S.

108 Prior literature<sup>7</sup> showed that costly plasmids are purged from bacterial populations at an  
109 exponential rate very rapidly, so it is reasonable to assume that the construct S—without  
110 pGW155B—will outgrow R in sustained pairwise competitions. But given the RY trade-off,  
111 it is no longer trivial to estimate the costs and consequences of plasmid carriage: Growth rate  
112 and lag data suggests that pGW155B is, indeed, costly to maintain (Figures 1A and S1B) but  
113 culture density data suggests it is beneficial. This uncertainty can be specially problematic for  
114 the estimation of mutant selection windows.

115 The range of antimicrobial concentrations that select for drug-resistant mutants is known  
116 as the ‘mutant selection window’<sup>6,29</sup>. Microbes that carry chromosomal mutations, or indeed

117 plasmids that protect them against antimicrobials incur in resistance costs that reduce the cell's  
118 growth rate<sup>6,7,24,30</sup>. It is predicated that, given these costs, selection on resistance occurs only  
119 when the antimicrobial drug is supplied at sufficiently high concentrations to leverage the differ-  
120 ence in growth rate between sensitive and resistant types—the ‘minimal selective concentration’  
121 or MSC<sup>6</sup>—existing a range of drug concentrations that optimally select for resistant mutants<sup>6,29</sup>.  
122 As I demonstrate below, resistant cells that exploit the above trade-off can be selected below  
123 MSCs.

124 The MSC for the construct R laid at  $0.052 \pm 0.004$   $\mu\text{g}/\text{mL}$  of tetracycline (Figure 2A).  
125 To test whether microbes exploiting a trade-off between growth rate and yield are still selected  
126 consistently with the mutant selection window hypothesis, I exposed a mixed culture containing  
127 equal proportions of each construct to a range of tetracycline concentrations. As above, the  
128 mixed culture was propagated after 24h into a microtitre plate with fresh media and antibiotic,  
129 and repeated the transfers for seven consecutive 24h seasons. The MSC did not change sub-  
130 stantially throughout the competition (Kruskal-Wallis H-test  $p = 0.3406$ ,  $\chi^2$ -statistic = 6.7912,  
131 Figure 2B), thus, it is reasonable to expect that R will be selected with higher tetracycline con-  
132 centrations. The selection coefficient<sup>31</sup> shows there was, indeed, selection for the construct R  
133 (Figure 2C), however, the selection coefficient for R was positive below the MSC. In other words,  
134 the construct R—harbouring pGW155B—was selected at lower-than-expected tetracycline con-  
135 centrations. Growth rate data was not informative of this selection process (Figure 2D), but it  
136 was with cell density data (Figure 2E) where the construct R is more abundant than S across  
137 all conditions.

138 Note the change in costs of pGW155B with respect to those in Figure 1B. First, in mixed  
139 culture conditions both constructs reached lower densities as glucose, the carbon source, is now  
140 shared between two types of microbe—as opposed to one in pure culture conditions. But, given  
141 the trade-off between growth rate and yield resulting from pGW155B carriage, R divides faster  
142 in mixed culture (Mann-Whitney U-test for growth rate in absence of tetracycline, pure *versus*  
143 mixed conditions,  $p = 6.21 \times 10^{-4}$ , ranksum = 37). And second, S is not fully inhibited in mixed  
144 culture conditions (Figure S2), resulting in detectable growth rates shown in Figure 2D. However  
145 its growth rate is higher than that measured in pure culture conditions at similar tetracycline  
146 concentrations. Thus, parameters such as the MSC measured in pure culture growth conditions,  
147 did not hold in competition.

148 **R-mutants with additional copies of pGW155B selected below the MSC.** The range  
149 of tetracycline concentrations that I used suppose less than 2% the minimum inhibitory con-  
150 centration for the construct R, however, Figure 2D shows that its growth rate declined with  
151 increasing tetracycline concentrations during the first season. However, in the last season, its  
152 growth rate remained unchanged. Figure 3A illustrates the relative difference in growth rate  
153 between both seasons, showing an increase in growth rate for the construct R over time that  
154 correlates with tetracycline concentration (linear regression  $p \approx 1.45 \times 10^{-4}$ ,  $F$ -statistic= 16.7,  
155 adjusted coefficient of determination  $R^2 = 0.222$ ; slope parameter 1.876,  $p \approx 1.99 \times 10^{-4}$ ,  $t$ -  
156 statistic= 3.9915). Importantly, yield and lag duration declined with higher drug concentra-

157 tions in the same period of time (Figures 3B and C), consistently with the above trade-off.  
158 Importantly, these changes were absent in the construct S with growth rate, yield, and lag not  
159 trading-off (Figure S3); so I asked whether the number of plasmids borne by R cells changed  
160 through time with different tetracycline concentrations. It did.

161 To quantify the relative abundance of pGW155B within R cells, I sampled the mixed cultures  
162 on days one and five, calculated the proportion of chromosomal DNA corresponding to the  
163 construct R, and used quantitative polymerase chain reaction (qPCR) to measure the number of  
164 plasmids borne per cell (see methods). The initial pool of cells from this strain, grown overnight  
165 and used to inoculate the cultures, contained  $30.21 \pm 6.72$  copies of pGW155B per cell (mean  
166  $\pm 95\%$  confidence,  $n = 3$ ). Without tetracycline, this number did not change significantly after  
167 one and five days of competition against S (Mann-Whitney U-test  $p = 0.1$ , ranksum = 15,  
168 Figure 3D). But the relative abundance of pGW155B changed rapidly with increasing drug  
169 concentrations. Within 24h the gain in plasmids was 2-fold, increasing 6- to 10-fold after five  
170 days of competition depending on tetracycline concentration (Figures 3E and F).

171 To understand the relationship between plasmid copy number and drug concentration I  
172 fitted two mathematical models to qPCR data. First the linear model  $p_c = p_0 + d\kappa$  and then  
173 the constant model  $p_c = \kappa$ , where  $\kappa$  denotes the slope or proportionality constant,  $p_0$  the  
174 initial number of copies borne by each R cell and  $d$  the antibiotic supplied. The constant  
175 model, that assumes no change in the number of plasmids borne per cell, was extremely unlikely  
176 (relative likelihood  $\approx 6.80 \times 10^{-42}$ , Figure 3E). Instead the linear model suggests that plasmid  
177 copy number correlates with drug concentration, where the constant of proportionality  $\kappa =$   
178  $161.87 \pm 110.37$  plasmids per mL per microgram of drug per cell ( $t$ -statistic = 2.8745,  $p = 0.0088$   
179 and 95% confidence interval (51.5, 272.2)). Albeit significant, with an adjusted coefficient of  
180 determination ( $R^2$ ) of 0.245, the linear model does not entirely capture the dynamics of qPCR  
181 data. A switch-like, non-linear model, say, the logistic model (see methods), explained better  
182 the variation in the number of pGW155B that I observed (adjusted  $R^2$  of 0.477). After five days  
183 of exposure to tetracycline the constant  $\kappa$  increased from  $161.87 \pm 110.37$  to  $880.19 \pm 705.71$   
184 plasmids per mL per microgram of drug per cell (Figure 3F,  $t$ -statistic = 2.4446,  $p = 0.0229$ , and  
185 95% confidence interval (174.5, 1585.9)). The predictive power declined for the logistic model,  
186 albeit it was still better than that for the linear model (adjusted  $R^2 = 0.394$  versus 0.261).

187 **Plasmid gains through random segregation.** Now the question is this: how did R cells gain  
188 additional copies of pGW155B? Note that *E. coli* cannot share the plasmid horizontally given  
189 pGW155B lacks the genes needed for horizontal gene transfer<sup>16,32</sup> (addgene vector database  
190 accession code 2853). So, I hypothesised the following: That random segregation, the mechanism  
191 underlying plasmids loss in the absence of selection<sup>7</sup>, can also facilitate their accumulation in  
192 bacteria. Suppose a microbe that harbours a plasmid and neither the microbe's chromosome  
193 nor the plasmid can mutate. If this microbe bears  $n$  copies of the plasmid and it replicates  
194 alongside the host's chromosome, the only means to gain or lose plasmids would be through  
195 the imperfect segregation of plasmids during cell division: one daughter cell would carry  $n + 1$   
196 plasmids whereas the other is left with  $n - 1$ . This process is how pGW155B, I hypothesise,

197 changed its relative abundance in *E. coli*.

198 The microbe's growth depends upon the active uptake of a carbon source,  $S$ , from the  
 199 environment, and it is inhibited by an antibiotic  $A$ . Based on these assumptions, I developed  
 200 a theoretical framework and used it to predict how the relative number of plasmids would  
 201 change through time when the bacterium is exposed to different concentrations of an antibiotic  
 202 (see methods). I implemented this hypothesis as a Markov process, where the segregation of  
 203 plasmids during cell division events is stochastic and independent of previous events. Assuming  
 204 that only one plasmid can be gained or lost during each event with probability  $\sigma$ , I defined the  
 205 growth of a microbial population,  $B$ , as

$$206 \quad \frac{dB}{dt} = \mathcal{M}(1 - c) \cdot G(A, S) \cdot B, \quad (1a)$$

$$207 \quad \frac{dA_i}{dt} = -d \cdot A_i + \phi \sum B \cdot (A_e - A_i), \quad (1b)$$

$$208 \quad \frac{dA_e}{dt} = -d \cdot A_e - \phi \sum B \cdot (A_e - A_i), \quad (1c)$$

$$209 \quad \frac{dS}{dt} = -U \cdot \sum B, \quad (1d)$$

210 where the uptake rate is given by

$$211 \quad U(S) = \frac{u_{max}S}{k_m + S} \quad (2)$$

212 and the growth function by

$$213 \quad G(A, S) = y \cdot U(S) \cdot \underbrace{\frac{1}{1 + \kappa A^2}}_{A\text{-Inhibition}}. \quad (3)$$

214 Here the growth function  $G(A, S)$  depends on the antibiotic  $A$  and carbon  $S$  supplied. The  
 215 carbon uptake follows Michaelis-Menten kinetics, with the maximum uptake rate given by  $u_{max}$   
 216 and  $k_m$  is the associated half-saturation constant. The antibiotic  $A$ , however, diffuses from the  
 217 environment ( $A_e$ ) into the cells ( $A_i$ ) with a rate  $\phi$ . The affinity of  $A$  for its target is given by the  
 218 constant  $\kappa$  and the Hill coefficient 2. Finally, the carbon captured by  $B$  cells is transformed into  
 219 biomass with yield  $y$ .  $B$  cells can harbour a plasmid so the associated cost of carriage is given  
 220 by  $c$  in equation 1d, which will vary depending upon the number of plasmids borne. Inherent to  
 221 the model is the emergence of subpopulations carrying different number of plasmids, from 0 to  
 222  $j - 1$  copies. Due to computational constraints I imposed  $j$  maximum copies and assumed that,  
 223 once the plasmid is lost, it cannot be recovered. The following transition probability matrix,  
 224  $\mathcal{M}$ , defines the relative abundance of each subpopulation

$$225 \quad \mathcal{M} = \begin{pmatrix} 1 & \sigma & 0 & \dots & 0 \\ 0 & 1 - 2\sigma & \sigma & 0 & \vdots \\ 0 & \sigma & 1 - 2\sigma & \sigma & \ddots \\ & 0 & \sigma & 1 - 2\sigma & \ddots & 0 \\ \vdots & & \ddots & \ddots & \ddots & \sigma \\ 0 & \dots & & 0 & 0 & 1 - \sigma \end{pmatrix}.$$

226 Figures 3G and H illustrate the qualitative change in population structure resulting from the  
227 exposure to the antibiotic *A*. When the microbe grows in the absence of drug, the subpopulation  
228 with fewer copies of the plasmid is more abundant whereas those containing more copies of it  
229 are rare. However, the distribution changes when the microbe is exposed to *A*. The optimal  
230 number of plasmids changes in the presence of drug, and so, with more antibiotic the most  
231 frequent subpopulation harbours more copies of the plasmid.

232 The experimental data set is consistent with this prediction (Figures 3I, J, and K). If the  
233 initial pool of *E. coli* cells contained  $30.21 \pm 6.72$  copies of the plasmid, after 24h of antibiotic  
234 challenge cells containing more copies rapidly emerged. The resulting distribution followed a  
235 Nakagami distribution (corrected Akaike Information Criterion AICc = 198.14, Negative Log-  
236 Likelihood  $NLogL = 96.79$ . See Methods) with parameters for shape  $\mu = 2.18$  and scale  
237  $\omega = 1.79 \times 10^3$  (95% confidence intervals are  $\mu = (1.29, 3.71)$  and  $\omega = (1367.1, 2348.9)$ ). The  
238 mean copies of plasmids borne per cell after this period were  $39.95 \pm 10.58$  (mean  $\pm$  95%  
239 confidence). These parameters changed when I prolonged the antibiotic challenge. After 120h of  
240 exposure to tetracycline the mean copies per cell increased to  $169.58 \pm 90.14$  and the resulting  
241 distribution now followed a skewed Birnbaum–Saunders distribution (AICc = 290.19, NLogL  
242 = 142.81 *versus* AICc = 293.66 and NLogL = 144.54 for the Nakagami distribution) with  
243 parameters for shape  $\gamma = 0.73$  and scale  $\beta = 133.52$  (95% confidence  $\gamma = (97.07, 169.98)$  and  
244  $\beta = (0.52, 0.94)$ ). Thus, the antibiotic challenge increased the frequency of cells bearing more  
245 copies of pGW155B consistently with this theory (Figure 3G) where the imperfect segregation  
246 of plasmid during cell division is the underlying mechanism.

## 247 Discussion

248 Studies that look beyond the effect of plasmids on growth rate are extremely rare<sup>12,13</sup>. Growth  
249 rate is associated with ‘fitness’ in microbes<sup>5,8,30</sup> and, therefore, it is used to measure the costs of  
250 plasmid carriage<sup>7,33,34</sup>. My study suggests, however, that plasmids alter more than just growth  
251 rate. This expands the number of traits that selection can act upon, in principle, regardless  
252 of the genes borne by plasmids and the trade-off between growth rate and yield that I report,  
253 mediated by the acquisition of pGW155B, is an example of this. Now, this begs the question  
254 of whether growth rate is a reliable predictor of plasmid maintenance or, more generally, the  
255 outcome of pairwise competitions. In my study it was not, given the trade-off between growth  
256 rate and yield, and that I favoured yield over growth rate to maintain pGW155B in R-cells  
257 without using tetracycline. This shows that ‘costs’ of plasmid carriage, or indeed, antimicrobial  
258 resistance are relative. However, I do not wish to overstate my results. Plasmids are incredibly  
259 diverse in terms of size, genes, or transfer mechanism<sup>32</sup>, so the trade-off may be absent in other  
260 types of plasmid. Nevertheless, this highlights that plasmids are not molecular parasites<sup>5,35</sup>  
261 necessarily and may provide their hosts with more benefits than previously thought.

262 The relativity of ‘costs’, and importantly the relativity of drug sensitivity, poses serious  
263 challenges to rationales, like the ‘mutant selection window’, that rely on plasmids or resistance  
264 costs. However, it also open new opportunities for drug therapy design. For example, if antibiotic

265 sensitivity depends on the trait used to assess it: Which one should be used to determine  
266 inhibitory concentrations and selection windows? Pathogens have different growth dynamics,  
267 with some dividing at faster rates than others<sup>36–38</sup>, so, it seems reasonable, drug sensitivity based  
268 on growth rate data could be more informative of the microbe’s sensitivity than sensitivity based  
269 on cell density data. But the relativity of costs and sensitivity can also have its drawbacks. For  
270 example, some traits may report a minimal selective concentration whereas other may not. The  
271 mutant selection window hypothesis claims that drug concentrations below the minimal selective  
272 concentration do not select for resistance<sup>6,8,26</sup>, however, antimicrobial-resistance genes (ARG)  
273 are increasingly detected in environments with residual drug concentrations<sup>39</sup>. The relationship  
274 between traits—here growth rate and yield—will determine whether such ‘safety’ net exists or  
275 not.

276 The changes in plasmid copy number that I found were unexpected, given the low tetra-  
277 cycline concentrations used and, particularly, the lack of horizontal gene transfer mechanisms.  
278 Plasmid DNA can be substantially higher than chromosomal DNA in bacteria<sup>40</sup>, and its rela-  
279 tive abundance can change within the body during infections<sup>41</sup>. It is therefore surprising that  
280 international AMR surveillance programmes<sup>42</sup> track only whether pathogens harbour plasmids,  
281 overlooking their relative abundance within the cell. This has practical implications. For ex-  
282 ample, the curation of plasmids from bacteria *in vivo* is gaining momentum as an alternative to  
283 treat drug-resistant infections<sup>43–46</sup>. But the technique is still inefficient. It should be self-evident  
284 that pathogens carrying fewer plasmids will be easier to treat than those bearing more copies  
285 of them, but the variations in the number of plasmids borne are often overlooked. Equally,  
286 microbes hosting more plasmids with antimicrobial-resistance genes should be less sensitive to  
287 antibiotics than those harbouring fewer plasmids—despite harbouring *exactly* the same plasmid.  
288 Reporting this information will be an asset in our fight against antimicrobial-resistant microbes.

## 289 Methods

290 **Media and Strains.** I used the strains of *Escherichia coli* GB(c) and Wyl<sup>47</sup> (a gift from Remy  
291 Chait and Roy Kishony), and M9 minimal media supplemented with 0.4% glucose and 0.1%  
292 casamino acids. I made tetracycline stock solutions from powder stock (Duchefa #0150.0025)  
293 at 5mg/mL in deionised water. Subsequent dilutions were made from this stock and kept at 4°C.

294  
295 **Batch transfer protocol.** I inoculated a 96-well microtitre plate containing 150µg/mL of  
296 media supplemented with tetracycline with a mixture of two overnight cultures, one of *E. coli*  
297 GB(c) and another of *E. coli* Wyl (Figure S4). The overnight culture for GB(c) was supple-  
298 mented with 100ng/mL of tetracycline to preserve the plasmid pGW155B carrying *tet(36)*<sup>47</sup>,  
299 centrifuged and removed prior adding to the microtitre plate. I incubated the plate at 30°C  
300 in a commercial spectrophotometer and measured the optical density of each well at 600nm  
301 (OD<sub>600</sub>), yellow florescence for the S strain (YFP excitation at 505nm, emission at 540nm),  
302 and cyan florescence for the R strain (CFP at 430nm/480nm) every 20min for 24h (a.k.a.  
303 *season*). After each season I transferred 1.5µL of each well, using a 96-well pin replicator, into



304 a new microtitre plate containing fresh growth medium and tetracycline.

305

306 **Growth parameter estimation.** Fluorescence protein genes were constitutively expressed  
307 with an approximately constant fluorescence to optical density ratio (Figure S5). This enabled  
308 me to use fluorescence as a proxy for culture density in mixed culture conditions. I normalised  
309 fluorescence readings with respect to optical density using the ratio OD to fluorescence in pure  
310 culture conditions as a reference.

311 I imported the resulting OD time series data set (Figures S6 and S7) into MATLAB R2014b  
312 to subtract background and calculate growth rate *per capita* (fitness,  $f$ ) using the following  
313 algorithm. First, I fitted three mathematical models to data: 1) linear model  $g(t) = b + f \cdot t$ , 2)  
314 exponential model  $g(t) = b + C \cdot \exp(f \cdot t)$  and 3) logistic model  $g(t) = b + K / (1 + C \cdot \exp(-f \cdot t))$ .  
315 The terms  $g(t)$  denote culture growth through time (in OD, YFP, or CFP units),  $b$  the inoculum  
316 size used to subtract the background,  $C$  is a parameter and  $K$  the maximal population size  
317 attained. I used the fitness reported by the model with the lowest corrected Akaike Information  
318 Criterion (AICc). To estimate the biomass yield I divided OD data in stationary phase by the  
319 glucose supplied<sup>21</sup>. I also used the highest density at any given time and the density reported  
320 by the data fit, both divided by glucose supply, as alternative metrics for biomass yield.

321 Finally, I calculated the selection coefficient for the plasmid-harboring strain using the re-  
322 gression model<sup>31</sup>  $s = \ln[R(t)/R(0)] \cdot t^{-1}$ , where  $R(0)$  is the initial ratio of resistant to susceptible  
323 (1:1) and  $R(t)$  the ratio at time  $t$ .

324

325 **Drug sensitivity parameter estimation.** I defined the minimum inhibitory concentration  
326 (MIC) for each trait as the tetracycline required to reduce the trait of the bacterium by a factor  
327 of 99%, compared to the tetracycline-free control. The MICs were  $0.364 \pm 0.012$  (mean  $\pm$  95%  
328 confidence), and  $0.351 \pm 0.013$  of tetracycline for the strain S using culture density and growth  
329 rate, respectively. For the strain R they were  $11.121 \pm 1.734$ , and  $9.103 \pm 0.379$   $\mu\text{g}/\text{mL}$ . Given  
330 the suppression of S in competition (Figure S2), I failed to detect its MICs in these conditions.  
331 I therefore relaxed the degree of inhibition from 99% to 90% (IC<sub>90</sub>) to allow the estimation of  
332 drug sensitivity parameters in competition.

333

334 **DNA material extraction.** For each concentration, I sampled three representative 150 $\mu\text{g}/\text{mL}$   
335 cultures that I divided into two groups for chromosome and plasmid DNA extraction. I Thermo-  
336 Scientific GeneJet DNA (#K0729) and GeneJet Plasmid (#K0502) extraction kits to extract  
337 chromosome and plasmid DNA from the samples, respectively, and used Qubit to quantify the  
338 yields. Both extracts were diluted accordingly in extraction buffer to normalise DNA across  
339 samples.

340

341 **Quantitative PCR and plasmid copy number estimation.** I used primer3 to design two  
342 pairs of primers with melting temperature ( $T_m$ ) of 60°C and non-overlapping probes with  $T_m$   
343 of 70°C. The amplicon ranges between 100 to 141bp depending on the locus (Table S1). Two  
344 reaction mixes were prepared using the kit 'Luminaris Color Probe Low ROX' (ThermoScientific

345 #K0342), adding 0.3 $\mu$ M of each primer and 0.2 $\mu$ M of the probe as per manufacturer specifica-  
346 tions. Following a calibration curve for each reaction (Figure S8) I added 0.01ng of chromosomal  
347 or plasmid DNA material to each of the reaction mixes.

348 To estimate the relative copies of pGW155B per R cell, I calculated the corresponding pro-  
349 portion of chromosomal DNA corresponding to the R-type from data in Figure 2D and used the  
350 formula<sup>7</sup>

$$351 \quad cn = \frac{(1 + E_c)^{C_{tc}}}{(1 + E_p)^{C_{tp}}} \times \frac{S_c}{S_p},$$

352 where  $cn$  is the number of plasmid copies per chromosome,  $S_c$  and  $S_p$  are the size of the chro-  
353 mosome and pGW155B amplicon in bp,  $E_c$  and  $E_p$  the efficiency of the qPCR taken from data  
354 in Figure S8, and  $C_{tc}$  and  $C_{tp}$  are the cycles at which I first detected product amplification  
355 ( $C_t$ ).

356 **Distribution fit to data.** To find the distribution that best fits qPCR data, I tried all  
357 distributions available in MATLAB 2014a using the built-in routine `fitdist`. I then used the  
358 negative log-likelihood (NLogL) function and corrected Akaike Information Criterion (AICc) as  
359 metrics for the goodness of fit, and sorted the distributions accordingly. Finally, I considered  
360 the best fit that distribution with the lowest NLogL and AICc.

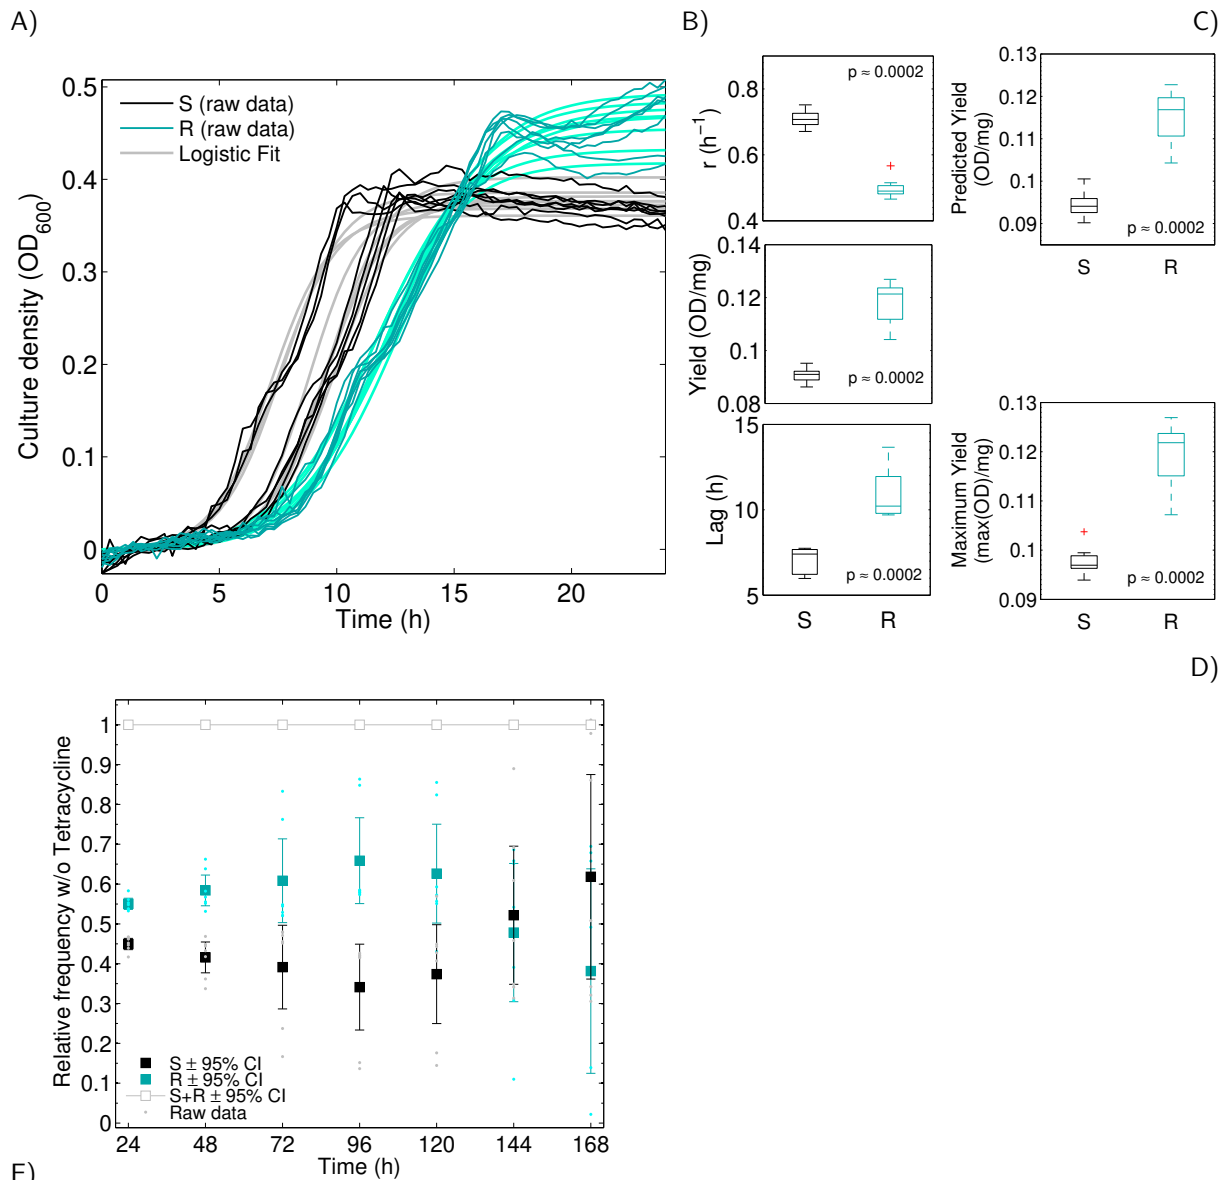

361 E)

362 **FIGURE 1. Rate-yield-lag (RYL) trade-off in construct harbouring pGW155B.** **A)** Overlapped  
 363 growth curves of strains S (black) and R (cyan) in the absence of tetracycline. I estimated the growth  
 364 rate ( $r$ ) *per capita*, population size in the equilibrium ( $K$ ), biomass yield (see main text), and lag from  
 365 logistic models fitted to data (see Methods) shown in grey and light cyan, respectively. **B)** Box plots for  
 366 each trait showing the median (centre of the box), 25th and 75th percentile of the data set. The whiskers  
 367 extend to the most extreme data points that are not outliers, and these are individually represented. The  
 368  $p$  value shown on top of each box plot refers to a Mann-Whitney U-test that I used to test differences in  
 369 the parameters between both strains. **C-D)** Alternative metrics for biomass yield (see methods) using  
 370 culture density reported by the data fit (C) and maximal culture density at any given time (D). The  $p$   
 371 values correspond to Mann-Whitney U-tests. **E)** Relative frequency (mean  $\pm$  95% CI) of each construct  
 372 during a 7-day long pairwise competition in the absence of tetracycline.

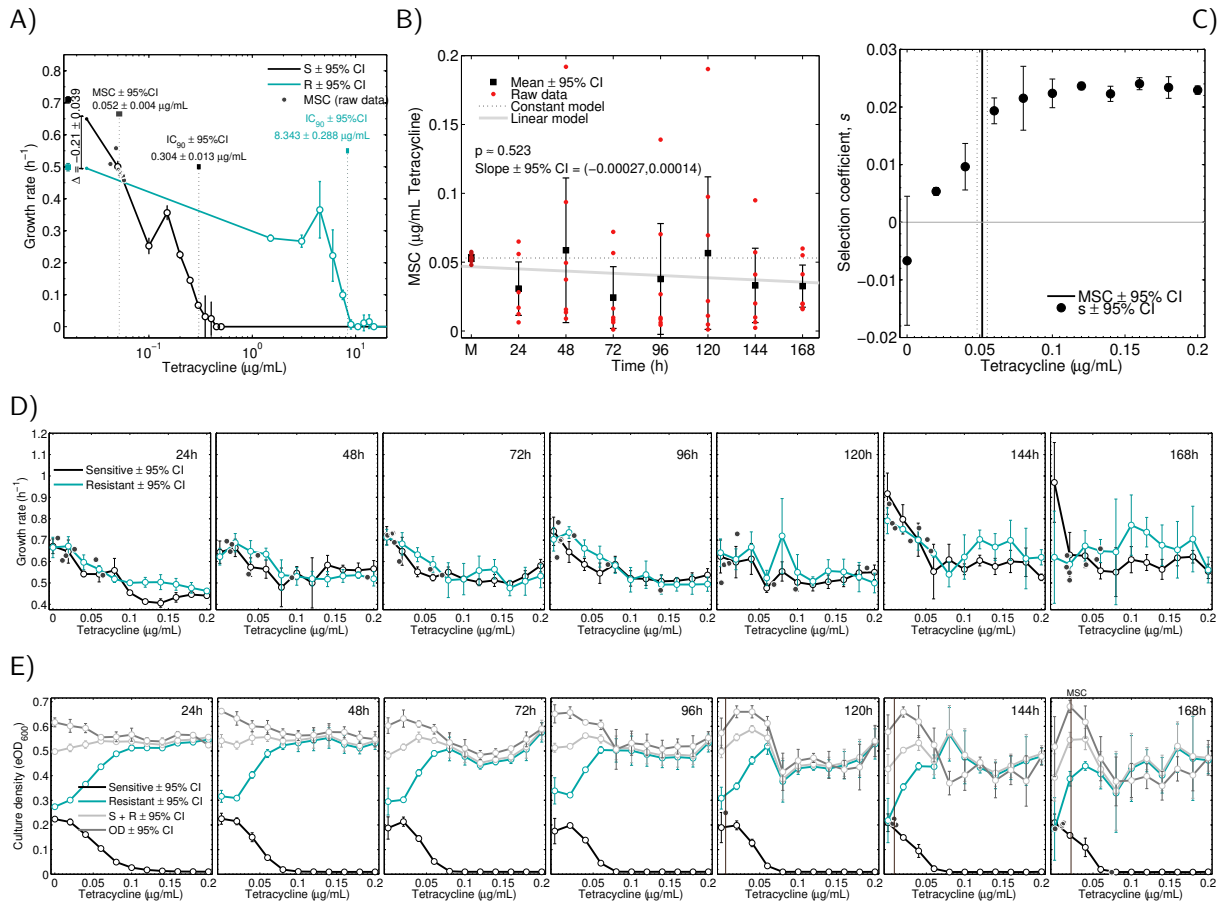

374 **FIGURE 2. Construct R selected below the minimal selective concentration.** **A)** Dose-response  
 375 profile for each strain showing the change in growth rate with increasing tetracycline concentrations. I  
 376 measured the costs of carrying pGW155B using growth rate from relative fluorescence growth data, with a  
 377 decrease of  $0.21 \pm 0.039 h^{-1}$  for R (mean  $\pm 95\%$  confidence,  $n = 8$ ). The profiles of both strains crossed-  
 378 over with  $0.052 \pm 0.004 \mu g/mL$  of tetracycline, defining the *minimal selective concentration*. **B)** Change  
 379 in MSC over time with respect to that measured in monoculture (M). Mean and 95% confidence interval  
 380 are shown as black error bars and the raw data as red dots. I fitted this data set to a constant (dotted  
 381 line) and linear (light grey) models, the  $p$  value and slope shown correspond to the linear model. **C)**  
 382 Selection coefficient for the resistant strain,  $s$ , at different tetracycline concentrations. I also represented  
 383 the MSC in B) and its 95% confidence interval as a reference. **D)** Change in *per capita* growth rate during  
 384 the 7-day pairwise competition showing both sensitive (S, black) and resistant (R, cyan) constructs of  
 385 *Escherichia coli*. In each subplot I present the mean growth rate  $\pm 95\%$  confidence ( $n = 8$ ) across  
 386 all tetracycline concentration corresponding to seven consecutive 24h seasons. The crossing point for  
 387 each replicate—minimal selective concentration or MSC—is shown as small, black circles. **E)** Same as  
 388 D), but I show change in cell density in optical density units derived from normalised fluorescence data  
 389 (see methods). In light grey I show the optical density of the mixed culture estimated from normalised  
 390 fluorescence data, and in dark grey the optical density measured at 600nm.

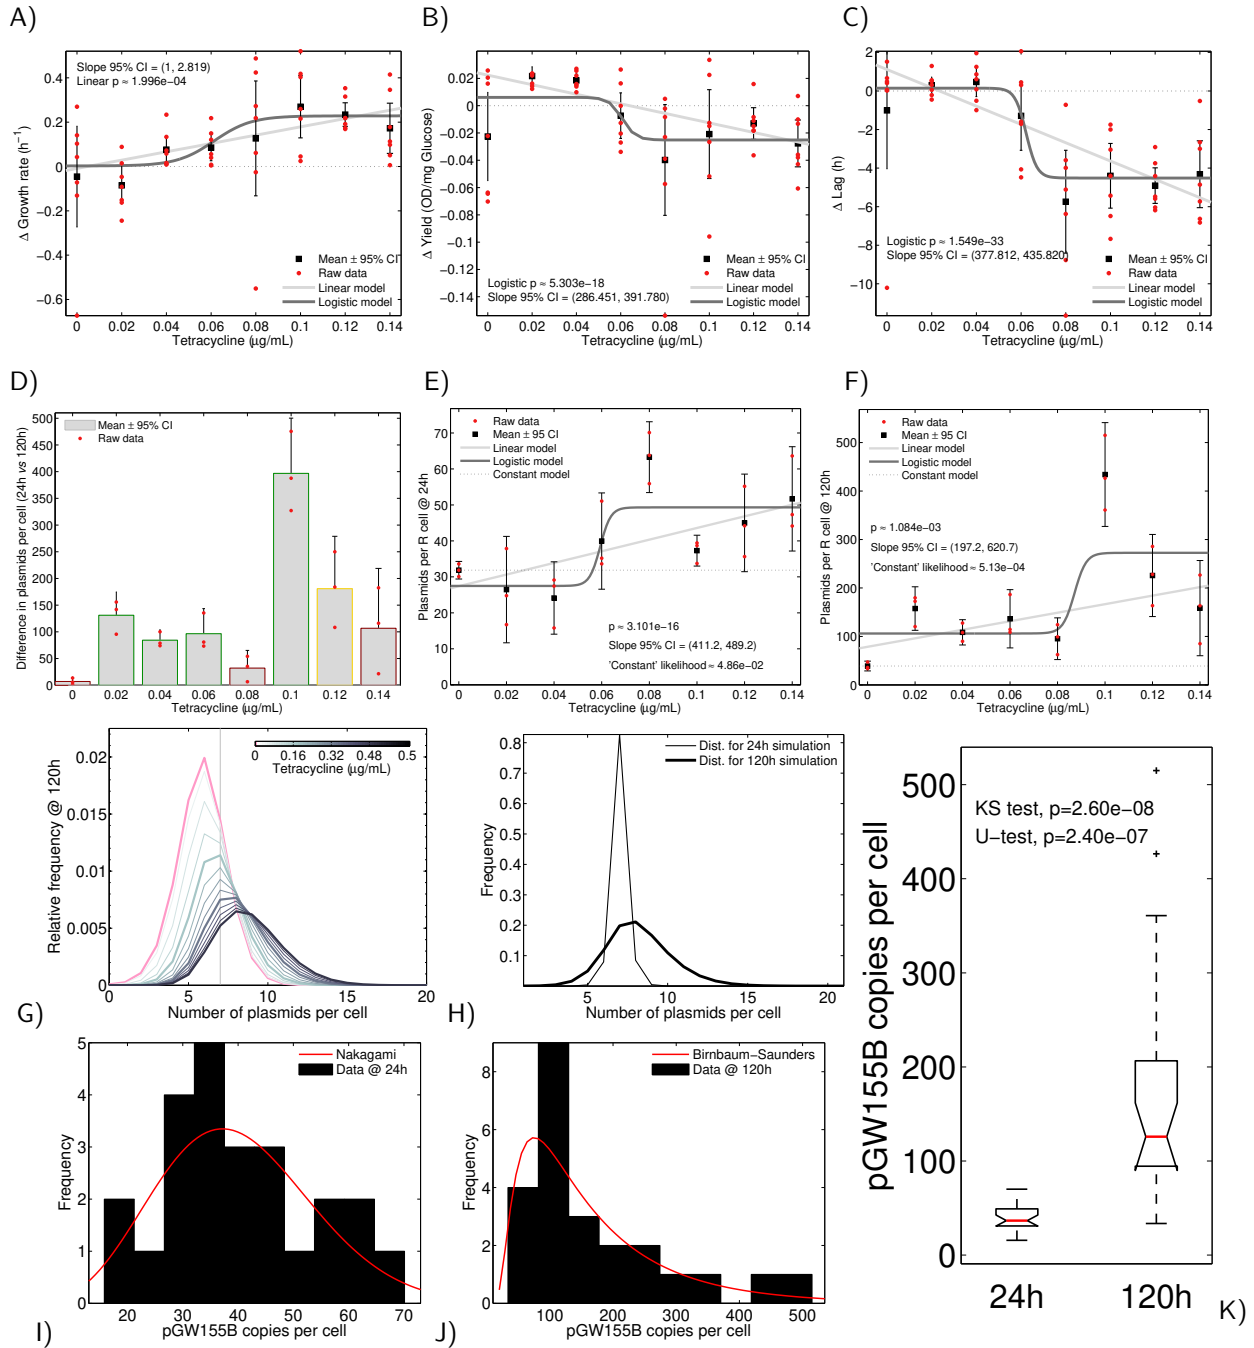

392 **FIGURE 3. Tetracycline-induced variation in pGW155B copy number results phenotypic**  
393 **changes compatible with the RYL trade-off. A-C)** Change in growth rate (A), biomass yield (B),  
394 and lag (C) after 168h exposure to different tetracycline concentrations. I show mean and 95% confidence  
395 interval as black error bars and raw data in red dots. The dotted black line represents a constant model  
396 (a.k.a. no change), light grey line represents a linear model, and dark grey a logistic model. The statistics  
397 shown in A-C are those for the model with the lowest corrected Akaike Information Criterion (AICc). **D)**  
398 Variation in pGW155B copy number after five days (120h) of exposure to tetracycline. Bars denote the  
399 mean and the errorbar 95% confidence of the mean; those with a green edge have a significant increase in  
400 copy number ( $p < 0.05$ ) according to Welch's  $t$ -test, red if it was not ( $p > 0.05$ ), and yellow if the test was  
401 inconclusive ( $p \approx 0.05$ ). Raw difference in qPCR data is shown as red dots. **E-F)** Copies of pGW155B  
402 borne by R cells exposed to different tetracycline concentrations after 24h (E) and 120h (F). I show the  
403 mean and 95% confidence interval of qPCR data as black errorbars, and raw qPCR data as red dots. The  
404 black dotted line represents the prediction from the constant model, in light grey that for the linear model,  
405 and in dark grey the prediction for the logistic model. Statistical significance ( $p$ ) for the slope parameter  
406 and confidence interval is shown for the model with lowest corrected Akaike Information Criterion, which  
407 was the logistic in both data sets: 190.153 *versus* 184.106 for 24h data (linear *versus* logistic), and 305.586  
408 *versus* 290.435 for 120h data. The likelihood function deemed the constant model unlikely (probability of  
409 0.0486 for 24h data, 0.0005 for 120h data), so I did not consider its AICc. **G)** Theoretical distributions  
410 of plasmid copy number as a function of antibiotic concentration. The thin, vertical line illustrates the  
411 initial distribution of plasmids—*analog to the inoculum in the experimental setup*. The distribution of  
412 plasmids for each drug concentration is shown in different colours from light green (low drug) to black  
413 (high drug), with thicker lines denoting higher drug concentrations. The distribution in the absence of  
414 antibiotic is shown in pink. **H)** Pooled frequency of plasmids after 24h and 120h of exposure to the  
415 drug using simulated data. **I-J)** Distribution of pGW155B copies in R-cells after 24h (I) and 120h (J)  
416 of exposure to tetracycline based on qPCR data. In red I represent the continuous distributions that  
417 best fit the data (red lines, see methods): 'Nakagami' for the 24h dataset and 'Birnbau-Saunders'  
418 for the 120h dataset. **K)** Two-sample Kolmogorov-Smirnov (KS) and Mann-Whitney U-tests to test  
419 whether both datasets come from different distributions. The box plot shows the median (red), 75th and  
420 25th percentile of the data set, and the whiskers extend to the most extreme data points not considered  
421 outliers. The outliers are plotted individually.

## 423 References

- 424 1. Slater, F. R., Bailey, M. J., Tett, A. J. & Turner, S. L. Progress towards understanding  
425 the fate of plasmids in bacterial communities. *FEMS Microbiol. Ecol.* **66**, 3–13 (2008).
- 426 2. Harrison, E. & Brockhurst, M. A. Plasmid-mediated horizontal gene transfer is a coevolu-  
427 tionary process. *Trends Microbiol.* **20**, 262–267 (2012).
- 428 3. Esser, K., Kück, U., *et al.* *Plasmids of Eukaryotes: Fundamentals and Applications* ISBN:  
429 9783642825859 (Springer Berlin Heidelberg, 2012).
- 430 4. Starikova, I., Sørum, V., *et al.* Fitness costs of various mobile genetic elements in Ente-  
431 rococcus faecium and Enterococcus faecalis. *J. Antimicrob. Chemother.* **68**, 2755–2765  
432 (2013).
- 433 5. Bergstrom, C. T., Lipsitch, M. & Levin, B. R. Natural selection, infectious transfer and  
434 the existence conditions for bacterial plasmids. *Genetics* **155**, 1505–1519 (2000).
- 435 6. Gullberg, E., Cao, S., *et al.* Selection of resistant bacteria at very low antibiotic concen-  
436 trations. *PLoS Pathog.* **7**, e1002158 (July 2011).
- 437 7. Millán, A. S., Peña-Miller, R., *et al.* Positive selection and compensatory adaptation in-  
438 teract to stabilize non-transmissible plasmids. *Nat. Commun.* **5** (2014).
- 439 8. Day, T., Huijben, S. & Read, A. F. Is selection relevant in the evolutionary emergence of  
440 drug resistance? *Trends Microbiol.* **23**, 126–133 (2015).
- 441 9. Sherratt, D. The Maintenance and Propagation of Plasmid Genes in Bacterial Populations  
442 The Sixth Fleming Lecture. *Microbiology* **128**, 655–661 (1982).
- 443 10. Byrd, J. J. & Colwell, R. R. Long-term survival and plasmid maintenance of Escherichia  
444 coli in marine microcosms. *FEMS Microbiol. Ecol.* **12**, 9–14 (1993).
- 445 11. Heuer, H, Krögerrecklenfort, E, *et al.* Gentamicin resistance genes in environmental bac-  
446 teria: prevalence and transfer. *FEMS Microbiol. Ecol.* **42**, 289–302 (2002).
- 447 12. Rhee, J. I., Ricci, J. C. D., Bode, J. & Schügerl, K. Metabolic enhancement due to plasmid  
448 maintenance. *Biotechnol. Lett.* **16**, 881–884 (1994).
- 449 13. Diaz Ricci, J. C. & Hernández, M. E. Plasmid effects on Escherichia coli metabolism. *Crit.*  
450 *Rev. Biotechnol.* **20**, 79–108 (2000).
- 451 14. Gonçalves, G. A., Bower, D. M., Prazeres, D. M., Monteiro, G. A. & Prather, K. L. Ratio-  
452 nal engineering of Escherichia coli strains for plasmid biopharmaceutical manufacturing.  
453 *Biotechnol. J.* **7**, 251–261 (2012).
- 454 15. Baltrus, D. A. Exploring the costs of horizontal gene transfer. *Trends Ecol. Evol.* **28**, 489–  
455 495 (2013).
- 456 16. Chait, R., Shrestha, S., Shah, A. K., Michel, J.-B. & Kishony, R. A Differential Drug  
457 Screen for Compounds That Select Against Antibiotic Resistance. *PLoS One* **5**, e15179  
458 (2010).

- 459 17. Pfeiffer, T., Schuster, S. & Bonhoeffer, S. Cooperation and competition in the evolution  
460 of ATP-producing pathways. *Science* **292**, 504–507 (2001).
- 461 18. Novak, M., Pfeiffer, T., Lenski, R. E., Uwe Sauer & Bonhoeffer, S. Experimental Tests for  
462 an Evolutionary Trade-Off between Growth Rate and Yield in *E. coli*. *Am. Nat.* **168**, pp.  
463 242–251. ISSN: 00030147 (2006).
- 464 19. Cheng, C., O'Brien, E. J., *et al.* Laboratory evolution reveals a two-dimensional rate-yield  
465 tradeoff in microbial metabolism. *PLoS Comput. Biol.* **15**, 1–17 (2019).
- 466 20. Scott, M., Klumpp, S., Mateescu, E. M. & Hwa, T. Emergence of robust growth laws from  
467 optimal regulation of ribosome synthesis. *Mol. Syst. Biol.* **10**, 747 (2014).
- 468 21. Reding-Roman, C., Hewlett, M., *et al.* The unconstrained evolution of fast and efficient  
469 antibiotic-resistant bacterial genomes. *Nat. Ecol. Evol.* **1**, 0050 (2017).
- 470 22. Andrews, J. M. Determination of minimum inhibitory concentrations. *J. Antimicrob. Chemother.*  
471 **48**, 5–16 (2001).
- 472 23. Drlica, K. & Zhao, X. Mutant selection window hypothesis updated. *Clin. Infect. Dis.* **44**,  
473 681–8 (Mar. 2007).
- 474 24. Andersson, D. I. & Hughes, D. Antibiotic resistance and its cost: is it possible to reverse  
475 resistance? *Nat. Revs. Microbiol.* **8**, 260–271 (2010).
- 476 25. Choi, J., Yoo, J., *et al.* A rapid antimicrobial susceptibility test based on single-cell mor-  
477 phological analysis. *Sci. Transl. Med.* **6**, 267ra174 (2014).
- 478 26. Rosenbloom, D. I., Hill, A. L., Rabi, S. A., Siliciano, R. F. & Nowak, M. A. Antiretroviral  
479 dynamics determines HIV evolution and predicts therapy outcome. *Nat. Med.* **18**, 1378–  
480 1385 (2012).
- 481 27. Finberg, R. W. & Guharoy, R. in *Clinical Use of Anti-infective Agents* 5–14 (Springer,  
482 2012).
- 483 28. Ajmal, S., Saleh, O. A. & Beam, E. Development of high-grade daptomycin resistance  
484 in a patient being treated for *Corynebacterium striatum* infection. *Antimicrob. Agents.*  
485 *Chemother.* **61** (2017).
- 486 29. Baquero, F. & Negri, M.-C. Challenges: Selective compartments for resistant microorgan-  
487 isms in antibiotic gradients. *Bioessays* **19**, 731–736 (1997).
- 488 30. Andersson, D. I. & Levin, B. R. The biological cost of antibiotic resistance. *Curr. Opin.*  
489 *Microbiol.* **2**, 489–493 (1999).
- 490 31. Dykhuizen, D. E. Experimental Studies of Natural Selection in Bacteria. *Annu. Rev. Ecol.*  
491 *Syst.* **21**, 373–398 (1990).
- 492 32. Smillie, C., Garcillán-Barcia, M. P., Francia, M. V., Rocha, E. P. & de la Cruz, F. Mobility  
493 of plasmids. *Microbiol. Mol. Biol. Rev.* **74**, 434–452 (2010).



- 494 33. MacLean, R. C., Hall, A. R., Perron, G. G. & Buckling, A. The population genetics of  
495 antibiotic resistance: integrating molecular mechanisms and treatment contexts. *Nat. Rev.*  
496 *Genet.* **11**, 405 (2010).
- 497 34. Lopatkin, A. J., Meredith, H. R., *et al.* Persistence and reversal of plasmid-mediated an-  
498 tibiotic resistance. *Nat. Commun.* **8**, 1689 (2017).
- 499 35. Svara, F. & Rankin, D. J. The evolution of plasmid-carried antibiotic resistance. *BMC*  
500 *Evol. Biol.* **11**, 130 (2011).
- 501 36. Korem, T., Zeevi, D., *et al.* Growth dynamics of gut microbiota in health and disease in-  
502 ferred from single metagenomic samples. *Science* **349**, 1101–1106. ISSN: 0036-8075 (2015).
- 503 37. Leggett, H. C., Cornwallis, C. K., Buckling, A. & West, S. A. Growth rate, transmission  
504 mode and virulence in human pathogens. *Philos. Trans. R. Soc. Lond., B, Biol. Sci.* **372**,  
505 20160094 (2017).
- 506 38. Gallagher, T., Phan, J. & Whiteson, K. Getting Our Fingers on the Pulse of Slow-Growing  
507 Bacteria in Hard-To-Reach Places. *J. Bacteriol.* **200** (ed DiRita, V. J.) ISSN: 0021-9193  
508 (2018).
- 509 39. Pikkemaat, M., Yassin, H, Fels-Klerkx, H. & Berendsen, B. *Antibiotic residues and resis-*  
510 *tance in the environment* tech. rep. (RIKILT Wageningen UR, 2016).
- 511 40. Zhong, C., Peng, D., *et al.* Determination of plasmid copy number reveals the total plasmid  
512 DNA amount is greater than the chromosomal DNA amount in *Bacillus thuringiensis* YBT-  
513 1520. *PLoS One* **6**, e16025 (2011).
- 514 41. Wang, H., Avican, K., *et al.* Increased plasmid copy number is essential for *Yersinia* T3SS  
515 function and virulence. *Science* **353**, 492–495 (2016).
- 516 42. *European Centre for Disease Prevention and Control. EU protocol for harmonised moni-*  
517 *toring of antimicrobial resistance in human Salmonella and Campylobacter isolates* tech.  
518 rep. (2016).
- 519 43. Baquero, F., Coque, T. M. & de la Cruz, F. Eco-Evo drugs and strategies: the need for  
520 novel tools to fight antibiotic resistance. *Antimicrob. Agents. Chemother.*, AAC-00013  
521 (2011).
- 522 44. Bikard, D., Euler, C. W., *et al.* Exploiting CRISPR-Cas nucleases to produce sequence-  
523 specific antimicrobials. *Nat. Biotech.* **32**, 1146 (2014).
- 524 45. Kamruzzaman, M., Shoma, S., Thomas, C. M., Partridge, S. R. & Iredell, J. R. Plasmid  
525 interference for curing antibiotic resistance plasmids in vivo. *PLoS One* **12**, e0172913 (2017).
- 526 46. Buckner, M. M., Ciusa, M. L. & Piddock, L. J. Strategies to combat antimicrobial resis-  
527 tance: anti-plasmid and plasmid curing. *FEMS Microbiol. Rev.* **42**, 781–804 (2018).
- 528 47. Chait, R., Craney, A & Kishony, R. Antibiotic interactions that select against resistance.  
529 *Nature* **446**, 668–671 (2007).

530 **Acknowledgements:** I thank R. Beardmore for in-depth comments on the manuscript; R.  
531 Chait and members of the Beardmore and Gudelj laboratories for comments. **Competing**  
532 **interests:** The author declares no competing interests.

533 **Supplementary Tables**

534 **TABLE S1.** Primers and probes designed using Primer3. Amplicon ranging from 100 to 141bp.  $T_m$   
 536 indicates the estimated melting temperature.

| Target gen     | Sequence (5' → 3')   | $T_m$ (°C) | Feature |
|----------------|----------------------|------------|---------|
| <i>tatB</i>    | CGATGAAGCGTTCCTACGTT | 60.27      | Forward |
|                | TCATGCGCAGCTTCATTATC | 59.94      | Reverse |
|                | AAGGCGAGCGATGAAGCGCA | 70.70      | Probe   |
| <i>tet(36)</i> | ATTGGGCATCTATTGGCTTG | 59.22      | Forward |
|                | CCGATTCACAGGCTTTCTTG | 60.76      | Reverse |
|                | AGCCTTTGCCAATTGGGGCG | 70.37      | Probe   |

538 **Supplementary Figures**

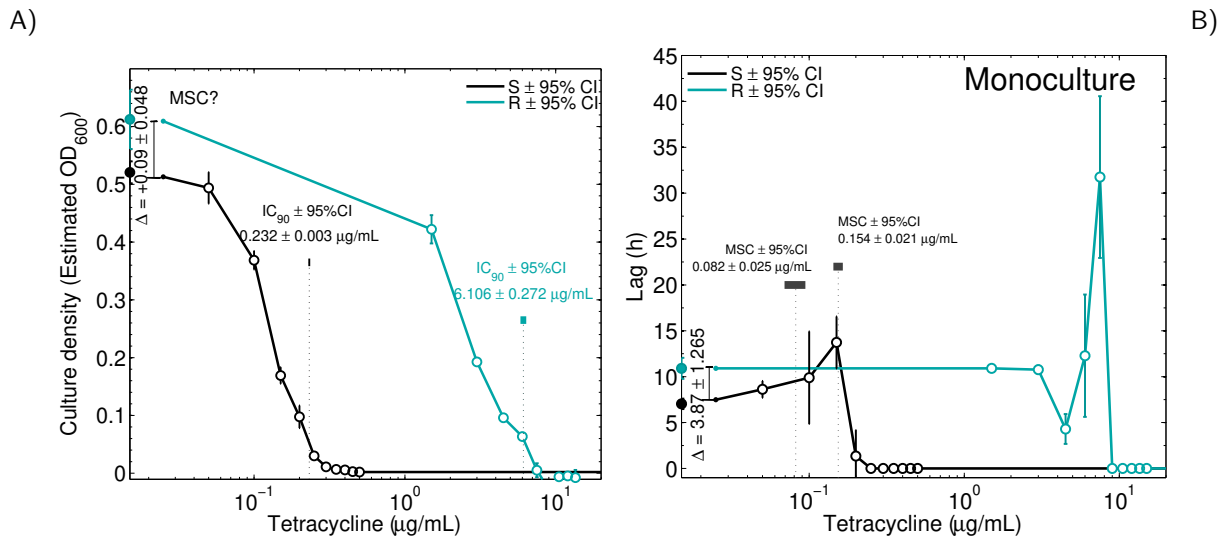

539 **FIGURE S1. Dose-response profile for tetracycline using culture density and lag data.** Dose-  
 540 response profiles for each strain showing the change in culture density (A) and lag (B) with increasing  
 541 tetracycline concentrations. The difference in R growth with respect to S was positive in antibiotic-free  
 542 conditions (mean ± 95% confidence). Consequently, I could not detect any tetracycline concentration at  
 543 which the profiles crossed over—*minimal selective concentration*—and establish the selection window for  
 544 S. I estimated culture density from fluorescence data normalised with respect to optical density data (see  
 545 methods). In lag data, the difference between both types without tetracycline was negative and, thus, I  
 546 could detect two MSCs at 0,082 ± 0.025 and .0154 ± 0.021 µg/mL of tetracycline.

20

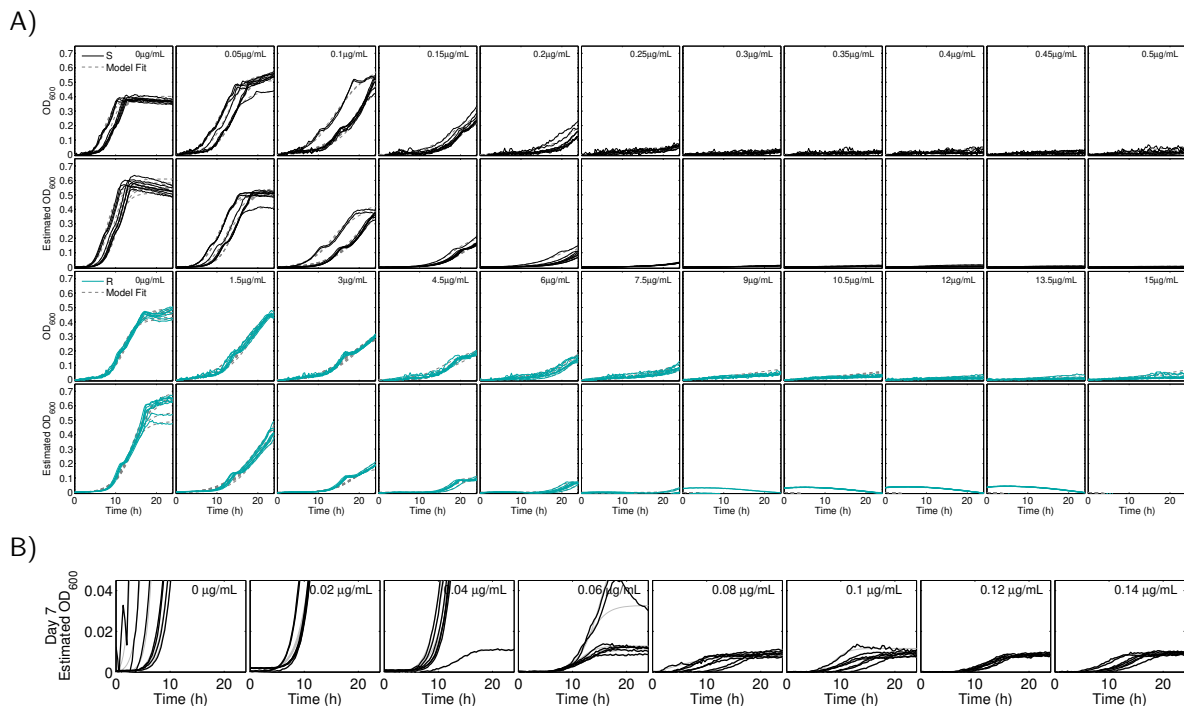

548 **FIGURE S2. Sensitive type not fully outcompeted during the competition.** **A)** Raw data for  
 549 the construct S (black) and R (cyan) growing in M9 media supplemented with increasing tetracycline  
 550 concentrations (different columns show different conditions). First and third rows show optical density  
 551 data measured at 600nm, whereas second and fourth rows show density data estimated from relative  
 552 fluorescence. **B)** Augmented detail of the evolved dose-response profiles of the tetracycline sensitive type  
 553 S after seven days of exposure to tetracycline. Density data measured every 20min for seven 24h seasons  
 554 (black) with the best fit to data (see main text) used to calculate growth parameters shown in grey.  
 555 Each column represents the data set for one 24h season and each row the data set for one tetracycline  
 556 concentration.

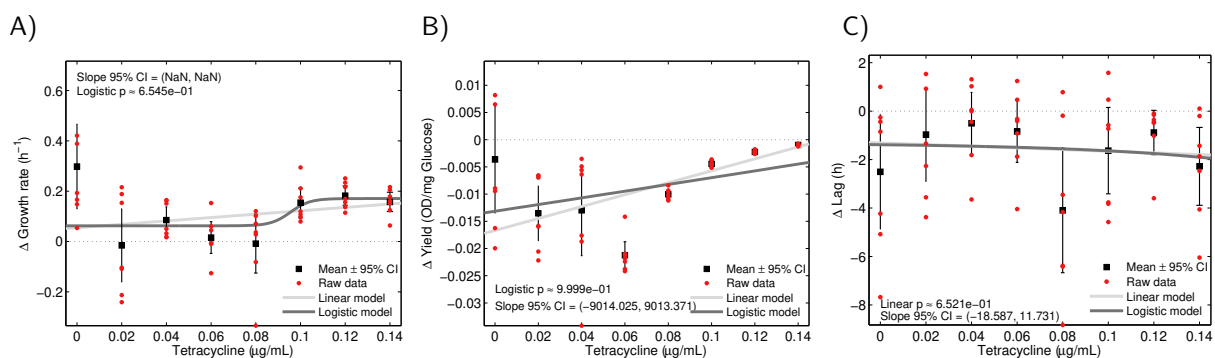

558 **FIGURE S3. No rate-yield-lag (RYL) trade-off observed for the construct S.** Variation in  
 559 growth rate (A), biomass yield (B), and lag (C) after 168h exposure to different tetracycline concentra-  
 560 tions. I show mean and 95% confidence interval as black error bars and raw data in red dots. The dotted  
 561 black line represents a constant model (a.k.a. no change), light grey line represents a linear model, and  
 562 dark grey a logistic model. The statistics shown in A-C are those for the model with the lowest corrected  
 563 Akaike Information Criterion (AICc).

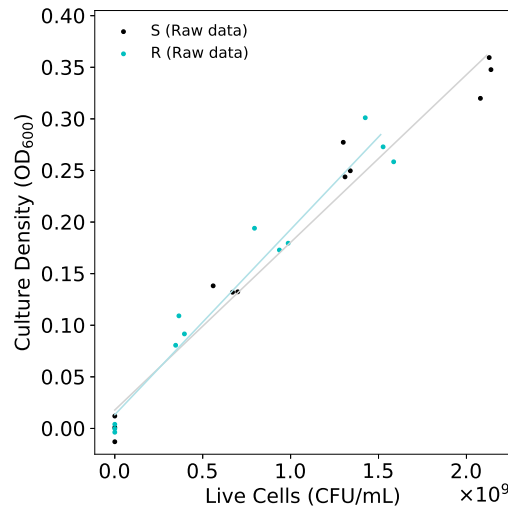

565 **FIGURE S4. Calibration curve to translate optical density data to number of *Escherichia***  
566 ***coli* cells.** I fitted the linear model  $a = bx + c$  to optical density and colony counting data (dots) to  
567 calculate the number of optical density units ( $OD_{600}$ ) per cell.  $a$  denotes the optical density readings  
568 measured at 600nm,  $c$  the crossing point with the  $y$ -axis when  $x = 0$ , and  $b$  the conversion factor  
569 between optical density and number of cells ( $x$ ). I interpolating optical density readings to calculate the  
570 number of cells within a culture as  $x = (a - c)/b$ . For the strain S,  $b = 1.62 \times 10^{-10} OD \cdot mL \cdot CFU^{-1}$   
571 and  $c = 1.78 \times 10^{-2} OD$ , whereas for R  $b = 1.79 \times 10^{-10} OD \cdot mL \cdot CFU^{-1}$  and  $c = 1.33 \times 10^{-2} OD$ .

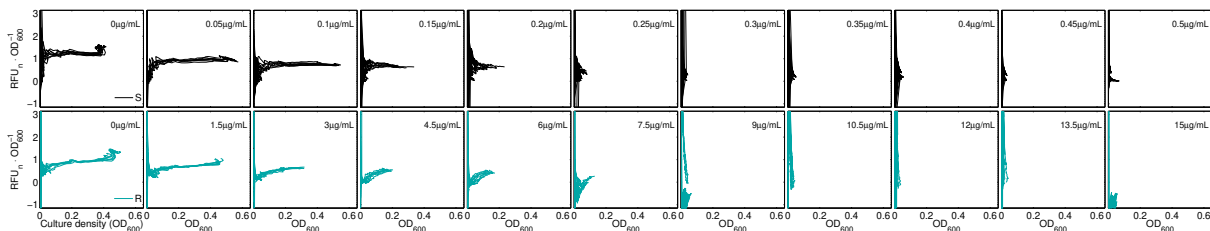

573 **FIGURE S5. Changes in relative fluorescence over time in both R and S strains.** Raw change  
574 in fluorescence, per optical density units, measured every 20min for 24h for the S- (black) and R-type.  
575 Each column represents the data set for each tetracycline concentration used.

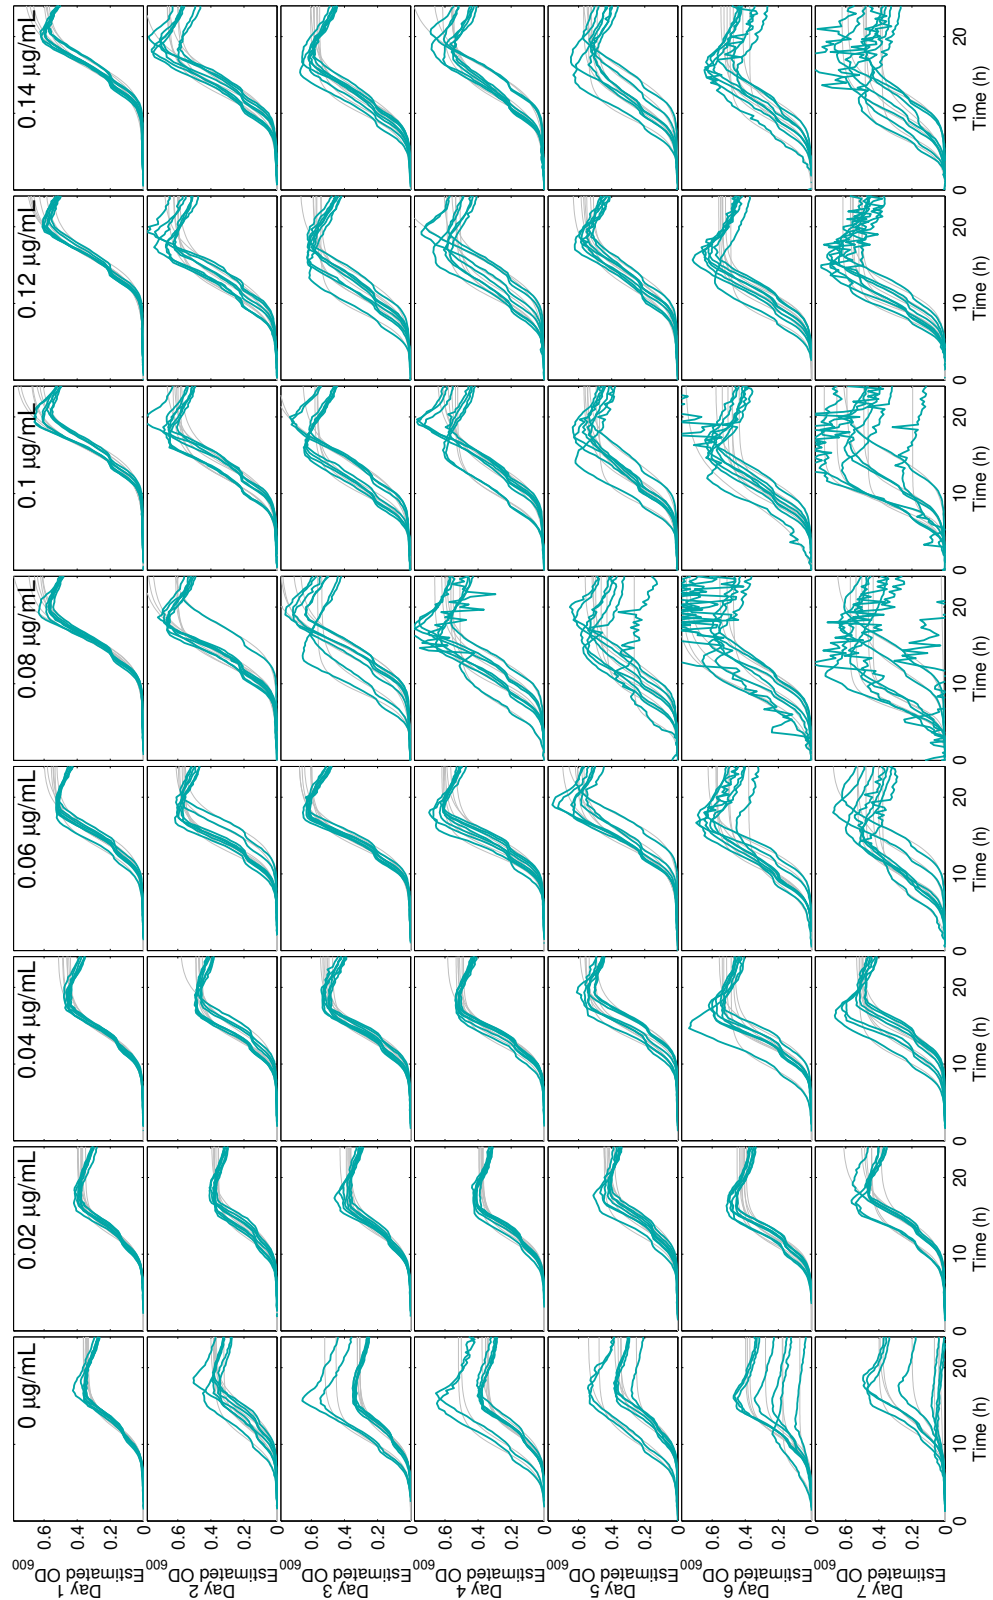

577 **FIGURE S6. Raw data and model fit for resistant R strain.** Raw optical Density data for GB(c)  
578 measured every 20min for seven 24h seasons (blue). The best fit to data (see methods in main text) used  
579 to calculate bacterial fitness is shown in grey. Each column represents the data set for one 24h season  
580 and each row the data set for one tetracycline concentration.

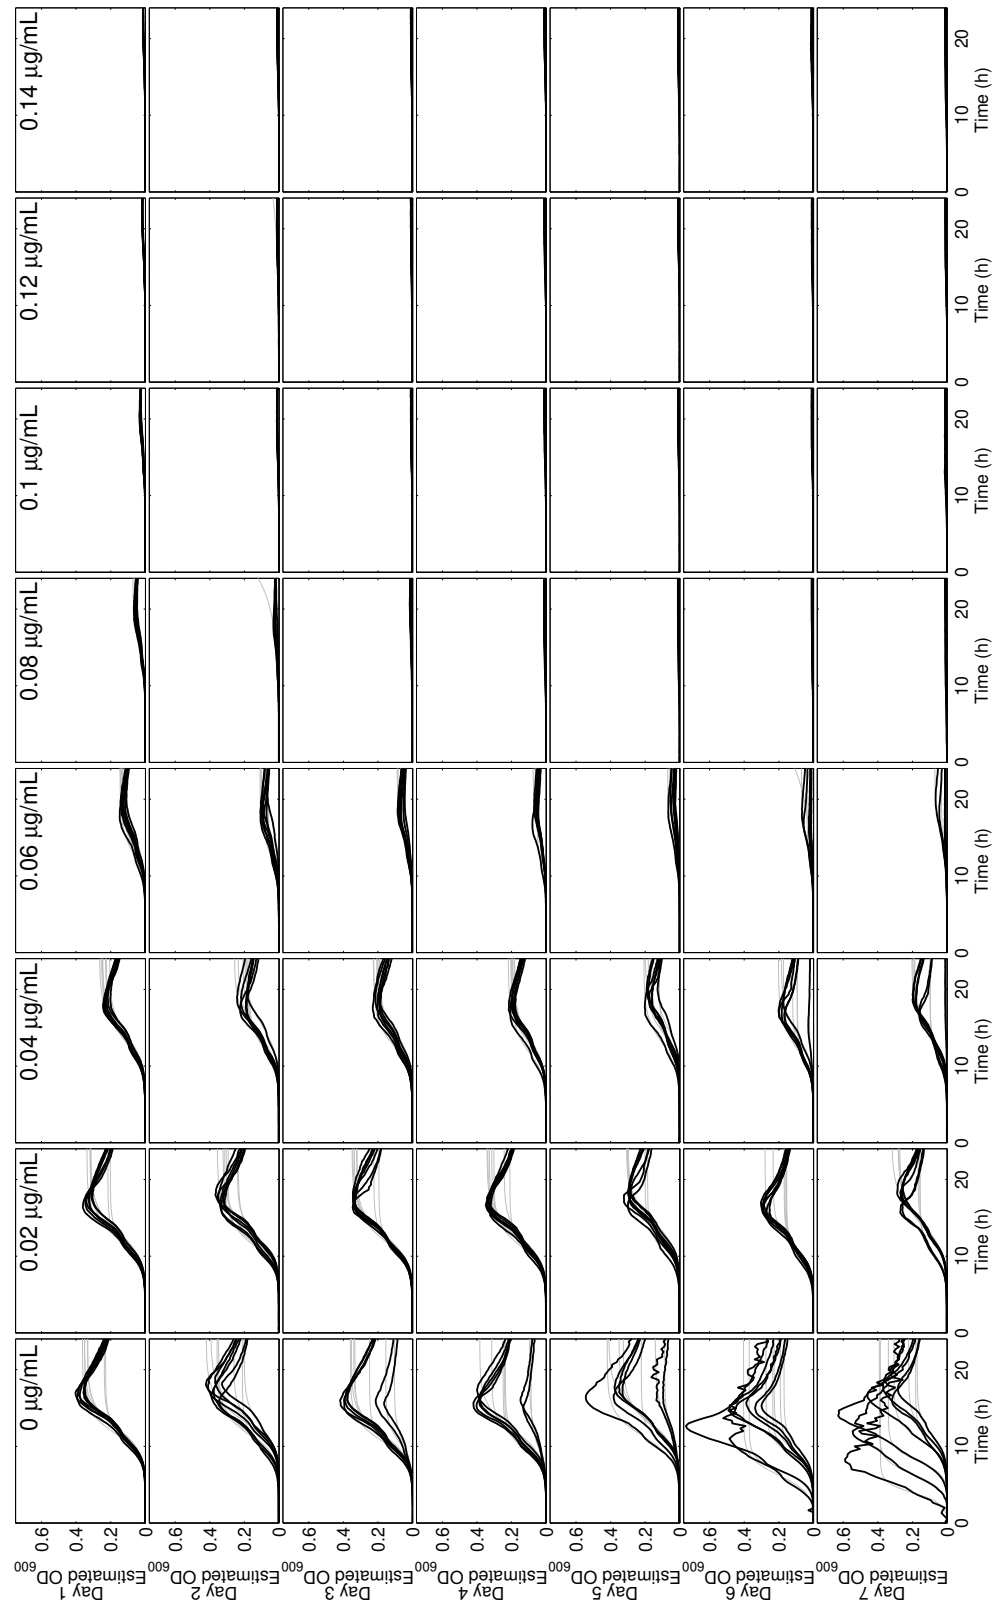

582 **FIGURE S7. Raw data and model fit for sensitive S strain.** Raw optical Density data for Wyl  
583 measured every 20min for seven 24h seasons (black). The best fit to data (see methods in main text)  
584 used to calculate bacterial fitness is shown in grey. Each column represents the data set for one 24h  
585 season and each row the data set for one tetracycline concentration.

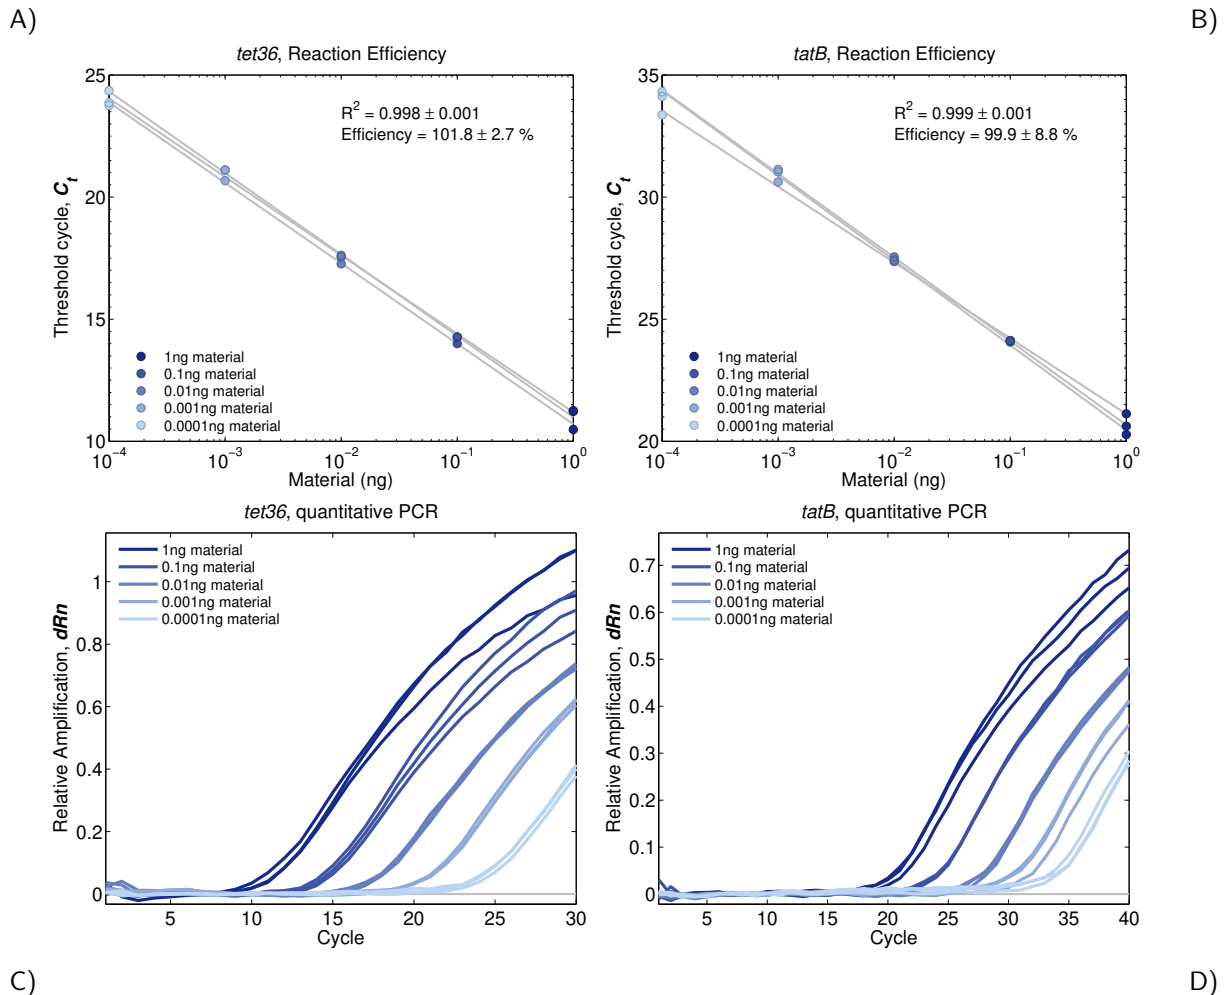

587 **FIGURE S8. Quantitative PCR calibration curves for *tet(36)* and *tatB*.** Reaction efficiency  
588 for the set of primers and probes listed in the ‘methods’ section for *tet(36)* (A) and *tatB*. The efficiency  
589 was calculated as  $E_f = 10^{-1/Slope} - 1$ , and the slope term calculated by fitting a linear model to qPCR  
590 threshold cycle ( $C_t$ ) data. The mean  $\pm$  standard deviation for the coefficient of determination  $R^2$  and  
591 efficiency are shown in the figures. The amplification curves for each reaction are shown in C) and D),  
593 respectively.
